# Supplementary material
Source: Springer Nature journal article supplement (https://www.springermedizin.de/resource/supplementary/12879_2009_1001_MOESM3_ESM.pdf/9442052)

(a)

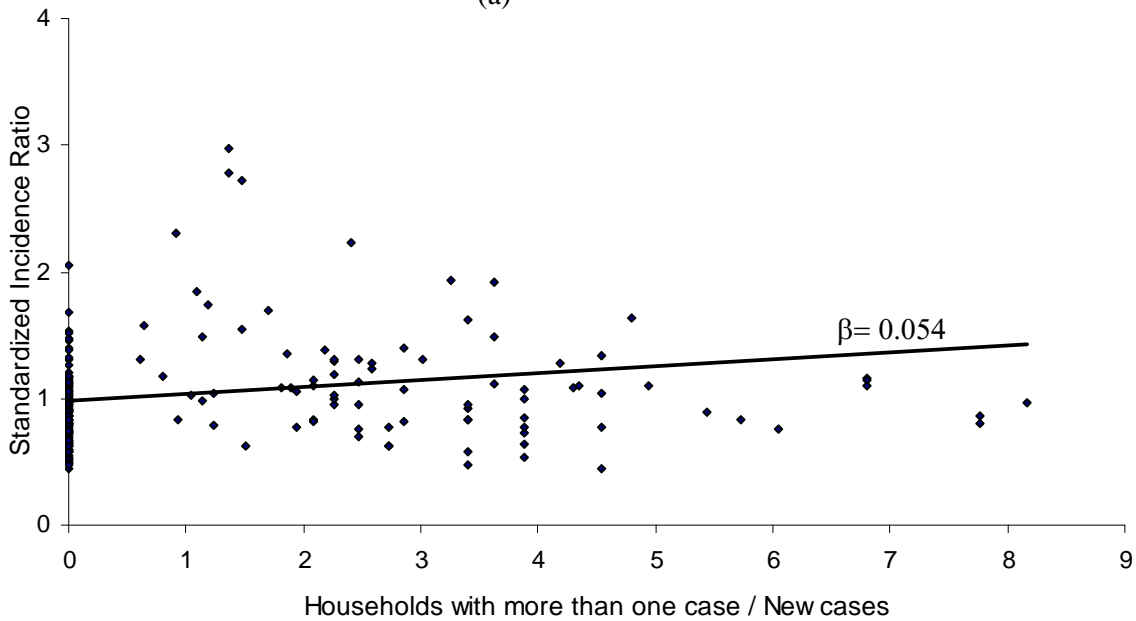

(b)

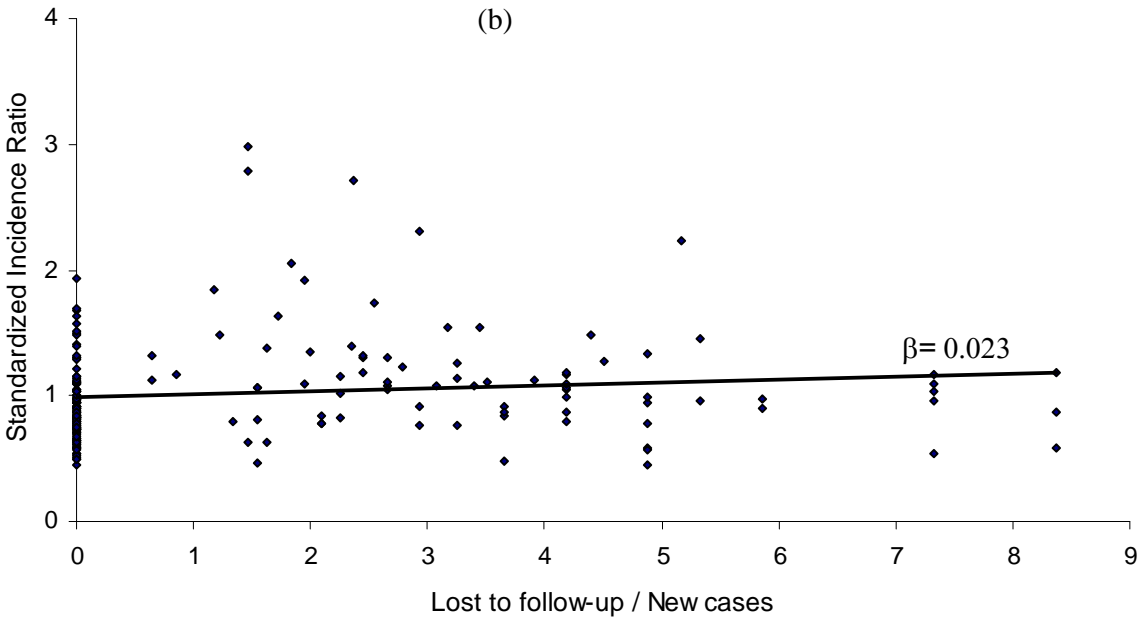

Supplement: MOESM3 [file 9442052]
